# Supplementary material for: Movement Behavior Patterns in People With First-Ever Stroke
Source: PubMed Central journal article supplement — Stroke. 2019 Oct 29;50(12):3553–60. doi: 10.1161/STROKEAHA.119.027013 (PMC7597994; doi:10.1161/strokeaha.119.027013), 2019-10-29
Supplement: str-50-3553-s001.pdf [file str-50-3553-s001.pdf]

## Supplementary materials - Movement behavior patterns in people with first-ever stroke

Roderick Wondergem, MSc, PT<sup>1,2,3</sup>; Cindy Veenhof, Ph.D., PT<sup>1,2,4</sup>; Eveline M.J. Wouters, Ph.D., MD<sup>3,5</sup>; Rob A. de Bie, Ph.D., PT<sup>6</sup>; Johanna M.A. Visser-Meily, Ph.D., MD<sup>2,7</sup>; Martijn F. Pisters, Ph.D., PT<sup>1,2,3</sup>

<sup>1</sup>Center for Physical Therapy Research and Innovation in Primary Care, Julius Health Care Centers, Utrecht, The Netherlands; <sup>2</sup>Department of Rehabilitation, Physical Therapy Science and Sport, Brain Center, University Medical Center Utrecht, Utrecht, the Netherlands; <sup>3</sup>Department of Health Innovations and Technology, Fontys University of Applied Sciences, Eindhoven, The Netherlands; <sup>4</sup>Expertise Center Healthy Urban Living, Research Group Innovation of Mobility Care, University of Applied Sciences Utrecht, Utrecht, the Netherlands; <sup>5</sup>Tilburg University, School of Social and Behavioral Sciences, Department of Tranzo, Tilburg, The Netherlands; <sup>6</sup>Maastricht University, Department of Epidemiology and Caphri Research School, Maastricht, The Netherlands; <sup>7</sup>Center of Excellence for Rehabilitation Medicine, Brain Center, University Medical Center Utrecht and De Hoogstraat Rehabilitation, Utrecht, The Netherlands

***Journal: Stroke***

***Corresponding author:*** Roderick Wondergem, MSc, PT,

***Mailing address:*** Room W01.121, Postbox 85500, 3508 GA Utrecht, The Netherlands

***E-mail address:*** [r.wondergem@umcutrecht.nl](mailto:r.wondergem@umcutrecht.nl)

***Phone number:*** +31614317727

***Orcid:*** 0000-0003-2611-7963

Table I Associated factors with sedentary exercisers, sedentary movers and sedentary prolongers using univariate analyses

| INDEPENDENT VARIABLES                      | SEDENTARY EXERCISERS |            |          | SEDENTARY MOVERS |           |          | SEDENTARY PROLONGERS |           |          |
|--------------------------------------------|----------------------|------------|----------|------------------|-----------|----------|----------------------|-----------|----------|
|                                            | OR                   | 95% CI     | P- value | OR               | 95% CI    | P- value | OR                   | 95% CI    | P- value |
| <b>PATIENT/ STROKE CHARACTERISTICS</b>     |                      |            |          |                  |           |          |                      |           |          |
| LOWER AGE                                  | 1.05                 | 1.02-1.09  | ≥0.001   | 0.98             | 0.96-1.01 | 0.24     | 0.98                 | 0.95-1.01 | 0.11     |
| MALE                                       | 2.93                 | 1.27-6.77  | 0.01     | 0.51             | 0.38-0.93 | 0.03     | 1.02                 | 0.54-1.93 | 0.96     |
| INFARCTION                                 | 1.29                 | 0.35-4.77  | 0.70     | 0.83             | 0.30-2.32 | 0.72     | 1.02                 | 0.34-3.07 | 0.98     |
| LEFT OF STROKE                             | 1.10                 | 0.65-1.87  | 0.73     | 0.87             | 0.56-1.35 | 0.53     | 1.09                 | 0.68-1.76 | 0.72     |
| MORE SEVERE STROKE SYMPTOMS                | 1.02                 | 0.93-1.11  | 0.70     | 1.05             | 0.98-1.13 | 0.17     | 0.94                 | 0.87-1.01 | 0.07     |
| HIGH EDUCATION LEVEL                       | 2.17                 | 1.07-4.40  | 0.03     | 0.58             | 0.31-1.09 | 0.09     | 0.95                 | 0.49-1.86 | 0.89     |
| LIVING TOGETHER                            | 0.75                 | 0.35-1.62  | 0.46     | 0.76             | 0.39-1.48 | 0.41     | 1.84                 | 0.84-4.03 | 0.13     |
| PHYSICAL INACTIVITY PRE STROKE             | 0.49                 | 0.22-1.11  | 0.09     | 0.90             | 0.43-1.48 | 0.47     | 2.14                 | 1.12-4.07 | 0.02     |
| FEWER PACKYEARS                            | 1.02                 | 1.00-1.05  | 0.03     | 1.00             | 0.99-1.01 | 0.86     | 0.99                 | 0.97-1.00 | 0.04     |
| LOWER BMI                                  | 1.08                 | 0.99-1.19  | 0.10     | 0.96             | 0.89-1.04 | 0.29     | 0.99                 | 0.91-1.07 | 0.72     |
| LIGHT ALCOHOL                              | 3.83                 | 1.72-8.55  | ≥0.001   | 0.60             | 0.33-1.06 | 0.08     | 0.69                 | 0.37-1.27 | 0.23     |
| LESS COMORBIDITIES                         | 1.20                 | 1.04-1.39  | 0.01     | 0.91             | 0.82-1.01 | 0.07     | 0.98                 | 0.88-1.10 | 0.75     |
| <b>PHYSICAL FUNCTIONING</b>                |                      |            |          |                  |           |          |                      |           |          |
| LOWER FUNCTIONING OF BALANCE               | 0.73                 | 0.61-0.88  | ≥0.001   | 1.03             | 0.98-1.08 | 0.23     | 1.05                 | 1.00-1.10 | 0.06     |
| NONCOMMUNITY WALKER                        | 0.15                 | 0.06-0.4   | ≥0.001   | 1.58             | 0.88-2.84 | 0.13     | 1.96                 | 1.05-3.64 | 0.04     |
| LOWER ACTIVITY LIMITATIONS                 | 0.91                 | 0.87-0.94  | ≥0.001   | 1.03             | 1.00-1.06 | 0.04     | 1.03                 | 1.01-1.06 | 0.02     |
| <b>PSYCHOLOGICAL AND COGNITIVE FACTORS</b> |                      |            |          |                  |           |          |                      |           |          |
| HIGHER LEVEL OF SELF-EFFICACY              | 0.98                 | 0.97-1.00  | 0.06     | 2.06             | 0.91-4.68 | 0.08     | 0.31                 | 0.10-0.95 | 0.04     |
| PASSIVE COPING                             | 0.98                 | 0.89-1.08  | 0.70     | 1.20             | 0.66-2.16 | 0.56     | 0.65                 | 0.35-1.21 | 0.17     |
| SEVERELY FATIGUED                          | 1.04                 | 1.02-1.07  | ≥0.001   | 0.99             | 0.97-1.01 | 0.32     | 1.97                 | 1.05-3.68 | 0.03     |
| COGNITIVE IMPAIRED                         | 0.86                 | 0.43-1.73  | 0.67     | 1.11             | 0.62-1.99 | 0.72     | 1.00                 | 0.54-1.87 | 1.00     |
| ABSENCE DEPRESSION                         | 3.59                 | 1.04-12.40 | 0.04     | 0.60             | 0.29-1.27 | 0.18     | 0.82                 | 0.38-1.80 | 0.62     |

OR=Odds ratio, CI= confidence interval

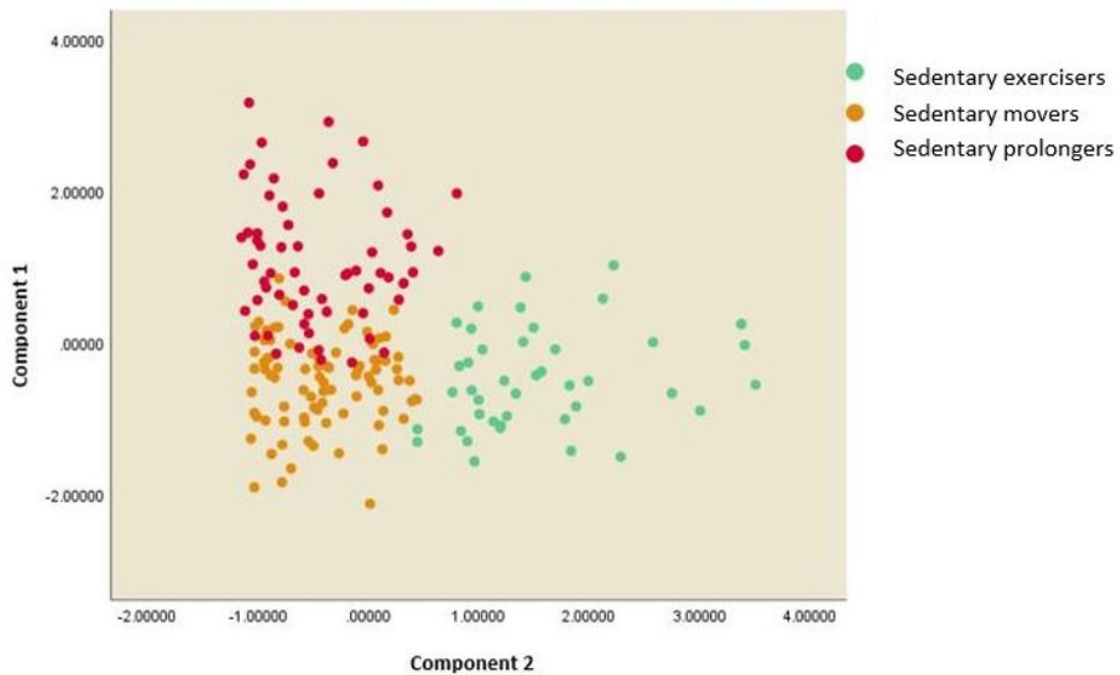

Figure 1a. Graph in two dimensions presenting the first and second components per movement behavior pattern. Component 1 represents the mean sedentary time (hours per day), mean sedentary time in bouts  $\geq 5$  minutes per day, mean LPA per day in hours, mean sedentary time in bouts  $\geq 30$  minutes per day and mean sedentary time in bouts  $\geq 60$  minutes per day. Component 2 represents the mean MVPA per day in hours and mean MVPA in bouts  $\geq 10$  minutes.

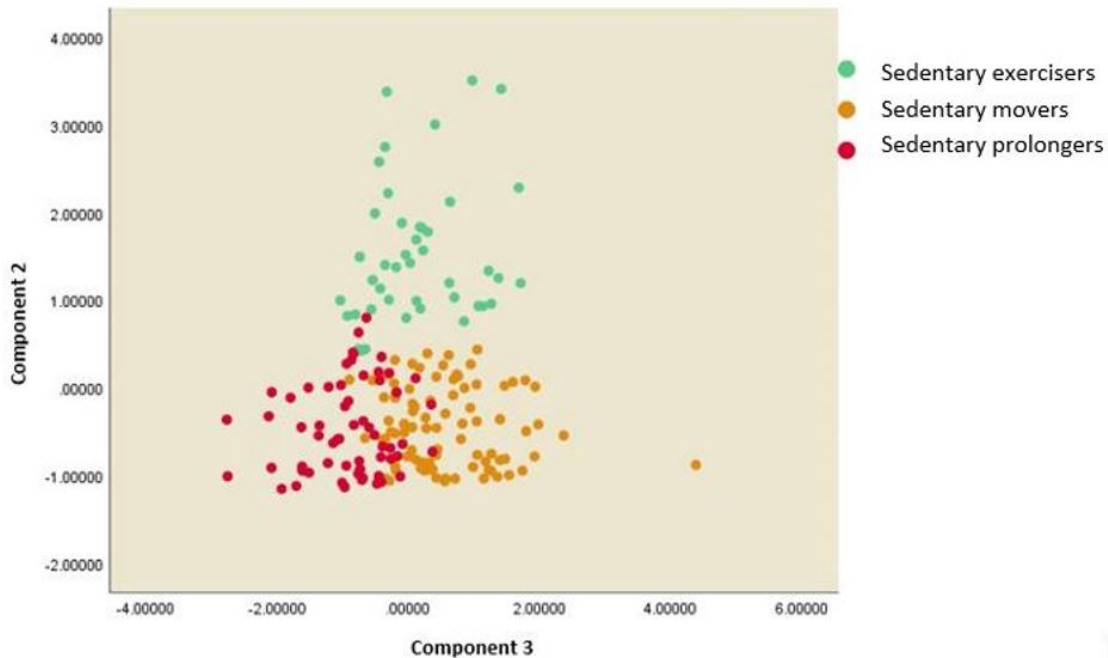

Figure 1b. Graph in two dimensions presenting the second and third components per movement behavior pattern. Component 2 represents the mean MVPA per day in hours and mean MVPA in bouts  $\geq 10$  minutes. Component 3 represents the weighted median sedentary bout length, maximum sedentary bout, and fragmentation index.

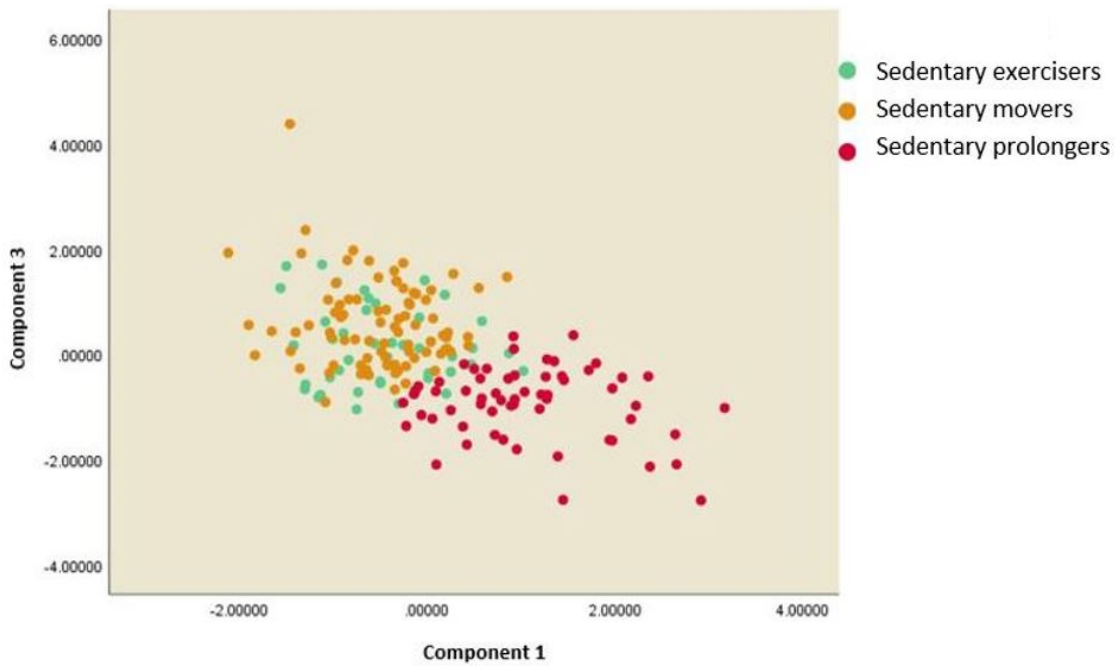

Figure 1c. Graph in two dimensions presenting the first and third components per movement behavior pattern. Component 3 represents the weighted median sedentary bout length, maximum sedentary bout, and fragmentation index. Component 1 represents the mean sedentary time (hours per day), mean sedentary time in bouts  $\geq 5$  minutes per day, mean LPA per day in hours, mean sedentary time in bouts  $\geq 30$  minutes per day and mean sedentary time in bouts  $\geq 60$  minutes per day.
