# Supplementary material for: Movement Behavior Patterns in People With First-Ever Stroke
Source: PubMed Central journal article supplement — Stroke. 2019 Oct 29;50(12):3553–60. doi: 10.1161/STROKEAHA.119.027013 (PMC7597994; doi:10.1161/strokeaha.119.027013), 2019-10-29
Supplement: str-50-3553-s002.pdf [file str-50-3553-s002.pdf]

Acknowledgment Permission Form

Journal Stroke  
 Manuscript Number 027013D  
 First Author R. Wondolgen  
 Title of Work Movement behavior patterns in people with first-ever stroke

Authors must provide written permission/approval from all individuals mentioned by name in the Acknowledgments section of a submitted manuscript. By signing this form, any and all acknowledged persons therefore state that they have read and approved the mention of their names in the Acknowledgment section of the aforementioned paper.

|           |                      |           |                    |      |                 |
|-----------|----------------------|-----------|--------------------|------|-----------------|
| Name (1)  | <u>Enisa Kockuqe</u> | Signature | <u>[Signature]</u> | Date | <u>3-4-2019</u> |
| Name (2)  | <u>Joeri Polman</u>  | Signature | <u>[Signature]</u> | Date | <u>4-4-2019</u> |
| Name (3)  |                      | Signature |                    | Date |                 |
| Name (4)  |                      | Signature |                    | Date |                 |
| Name (5)  |                      | Signature |                    | Date |                 |
| Name (6)  |                      | Signature |                    | Date |                 |
| Name (7)  |                      | Signature |                    | Date |                 |
| Name (8)  |                      | Signature |                    | Date |                 |
| Name (9)  |                      | Signature |                    | Date |                 |
| Name (10) |                      | Signature |                    | Date |                 |
| Name (11) |                      | Signature |                    | Date |                 |
| Name (12) |                      | Signature |                    | Date |                 |
| Name (13) |                      | Signature |                    | Date |                 |
| Name (14) |                      | Signature |                    | Date |                 |
| Name (15) |                      | Signature |                    | Date |                 |
| Name (16) |                      | Signature |                    | Date |                 |
| Name (17) |                      | Signature |                    | Date |                 |
| Name (18) |                      | Signature |                    | Date |                 |
| Name (19) |                      | Signature |                    | Date |                 |
| Name (20) |                      | Signature |                    | Date |                 |
